# Supplementary material for: The Prophylactic Effects of Glutamine on Muscle Protein Synthesis and Degradation in Rats with Ethanol-Induced Liver Damage
Source: MDPI journal article supplement (doi:10.3390/nu13082788), 2021-08-14
Supplement: s1 [file s1]

Supplement 1 Effects of glutamine supplementation on plasma and hepatic triglyceride levels in chronic ethanol-fed rats<sup>1,2</sup>

| Group | Plasma (mg/dL) | Liver (mg/g liver) |
|-------|----------------|--------------------|
| CC    | 54.0 ± 24.6    | 12.0 ± 1.9         |
| CE    | 48.1 ± 16.4    | 15.3 ± 0.5         |
| GG    | 36.4 ± 13.8    | 14.6 ± 0.7         |
| GE    | 46.6 ± 30.1    | 14.0 ± 1.5         |
| GEG   | 31.5 ± 16.2    | 13.0 ± 1.0         |

<sup>1</sup>Values were expressed as the mean ± SD.

<sup>2</sup>The CC group was fed the control diet for 8 weeks; the GG group was fed a glutamine-containing diet for 8 weeks; the CE group was fed the control diet the first 2 weeks and then an ethanol-containing diet for the next 6 weeks; the GE group was fed a glutamine-containing diet the first 2 weeks and then an ethanol-containing control diet for the next 6 weeks; the GEG group was fed a glutamine-containing diet for the first 2 weeks, and then a glutamine-containing diet with ethanol for the next 6 weeks.

Supplement 2 Effects of glutamine supplementation on amino acid composition in rats chronically fed ethanol<sup>1,2</sup>

|     | Blood (μM)                   |                              |                            |                              |                            | Liver (μM)                  |                              |                              |                             |                              | Muscle (μM)                 |                              |                              |                              |                              |
|-----|------------------------------|------------------------------|----------------------------|------------------------------|----------------------------|-----------------------------|------------------------------|------------------------------|-----------------------------|------------------------------|-----------------------------|------------------------------|------------------------------|------------------------------|------------------------------|
|     | CC                           | CE                           | GG                         | GE                           | GEG                        | CC                          | CE                           | GG                           | GE                          | GEG                          | CC                          | CE                           | GG                           | GE                           | GEG                          |
| Val | 166.37 ± 18.43               | 165.09 ± 32.31               | 137.09 ± 13.83             | 370.88 ± 232.93              | 310.77 ± 231.09            | 683.10 ± 4.49 <sup>a</sup>  | 463.85 ± 57.48 <sup>b</sup>  | 643.03 ± 23.60 <sup>a</sup>  | 662.39 ± 12.56 <sup>a</sup> | 623.46 ± 80.80 <sup>a</sup>  | 144.04 ± 18.56              | 117.75 ± 18.65               | 130.98 ± 120.27              | 111.25 ± 16.78               | 89.22 ± 24.06                |
| Tyr | 145.71 ± 13.85               | 154.80 ± 13.36               | 154.11 ± 68.90             | 150.67 ± 42.24               | 147.55 ± 6.10              | 400.49 ± 37.62              | 484.23 ± 26.76               | 395.50 ± 100.87              | 432.19 ± 69.50              | 502.28 ± 33.43               | 163.56 ± 23.11              | 174.87 ± 82.70               | 151.15 ± 128.32              | 182.98 ± 43.29               | 213.23 ± 76.24               |
| Thr | 0.35 ± 0.60                  | 0.06 ± 0.11                  | 0.17 ± 0.29                | 0.00 ± 0.00                  | 0.21 ± 0.37                | 9.48 ± 3.22 <sup>b</sup>    | 33.98 ± 23.68 <sup>a</sup>   | 4.68 ± 2.40 <sup>b</sup>     | 4.82 ± 2.91 <sup>b</sup>    | 7.36 ± 2.96 <sup>b</sup>     | 0.00 ± 0.00                 | 0.39 ± 0.57                  | 1.26 ± 1.90                  | 1.04 ± 1.35                  | 0.29 ± 0.51                  |
| Ser | 0.00 ± 0.00                  | 0.00 ± 0.00                  | 0.00 ± 0.00                | 0.00 ± 0.00                  | 0.00 ± 0.00                | 0.00 ± 0.00                 | 0.00 ± 0.00                  | 0.00 ± 0.00                  | 0.00 ± 0.00                 | 0.00 ± 0.00                  | 0.00 ± 0.00                 | 0.00 ± 0.00                  | 11.87 ± 20.55                | 0.04 ± 0.06                  | 0.00 ± 0.00                  |
| Pro | 24.04 ± 1.63 <sup>b</sup>    | 25.92 ± 4.91 <sup>ab</sup>   | 23.91 ± 0.47 <sup>b</sup>  | 24.67 ± 0.77 <sup>b</sup>    | 29.84 ± 1.47 <sup>a</sup>  | 158.11 ± 19.35 <sup>b</sup> | 227.65 ± 48.30 <sup>ab</sup> | 317.12 ± 6.66 <sup>a</sup>   | 297.63 ± 49.09 <sup>a</sup> | 223.29 ± 91.17 <sup>ab</sup> | 21.26 ± 1.37 <sup>b</sup>   | 19.26 ± 1.00 <sup>b</sup>    | 34.42 ± 13.23 <sup>a</sup>   | 17.28 ± 2.36 <sup>b</sup>    | 15.77 ± 2.99 <sup>b</sup>    |
| Phe | 159.75 ± 23.48 <sup>ab</sup> | 153.97 ± 18.72 <sup>ab</sup> | 136.89 ± 4.29 <sup>b</sup> | 154.48 ± 16.65 <sup>ab</sup> | 176.98 ± 5.32 <sup>a</sup> | 598.32 ± 0.58 <sup>ab</sup> | 592.16 ± 2.62 <sup>bc</sup>  | 596.40 ± 2.99 <sup>abc</sup> | 590.87 ± 5.82 <sup>c</sup>  | 598.82 ± 3.60 <sup>a</sup>   | 279.25 ± 26.64              | 186.05 ± 60.65               | 255.66 ± 230.49              | 213.48 ± 73.23               | 137.81 ± 22.67               |
| Lys | 1.57 ± 0.39                  | 3.34 ± 2.86                  | 1.79 ± 0.60                | 2.69 ± 0.72                  | 2.66 ± 0.90                | 12.90 ± 3.69 <sup>c</sup>   | 18.95 ± 5.50 <sup>ab</sup>   | 22.81 ± 0.53 <sup>ab</sup>   | 22.54 ± 3.39 <sup>ab</sup>  | 29.78 ± 14.38 <sup>a</sup>   | 6.39 ± 1.49                 | 4.01 ± 0.27                  | 7.97 ± 4.46                  | 5.50 ± 1.92                  | 6.19 ± 2.06                  |
| Leu | 165.78 ± 53.98               | 294.45 ± 113.12              | 298.90 ± 72.42             | 169.77 ± 37.03               | 230.88 ± 74.04             | 558.39 ± 11.11              | 543.53 ± 201.17              | 622.77 ± 77.04               | 674.87 ± 58.40              | 614.07 ± 111.96              | 322.07 ± 17.74 <sup>a</sup> | 254.93 ± 151.22 <sup>b</sup> | 206.54 ± 143.45 <sup>b</sup> | 522.34 ± 117.05 <sup>a</sup> | 385.48 ± 215.84 <sup>a</sup> |
| Ile | 227.68 ± 41.22               | 249.81 ± 77.59               | 293.00 ± 22.15             | 215.63 ± 33.52               | 286.91 ± 87.46             | 668.15 ± 45.00 <sup>b</sup> | 613.80 ± 13.65 <sup>c</sup>  | 725.33 ± 3.15 <sup>a</sup>   | 701.76 ± 8.82 <sup>ab</sup> | 731.92 ± 43.65 <sup>a</sup>  | 235.60 ± 22.26              | 237.08 ± 79.68               | 225.30 ± 171.59              | 257.01 ± 82.55               | 227.51 ± 55.77               |
| Gly | 0.00 ± 0.00                  | 0.00 ± 0.00                  | 0.00 ± 0.00                | 0.00 ± 0.00                  | 0.00 ± 0.00                | 0.00 ± 0.00                 | 0.00 ± 0.00                  | 0.00 ± 0.00                  | 0.00 ± 0.00                 | 0.00 ± 0.00                  | 0.00 ± 0.00                 | 0.00 ± 0.00                  | 5.79 ± 10.03                 | 0.00 ± 0.00                  | 0.00 ± 0.00                  |
| Gln | 7.22 ± 0.58 <sup>a</sup>     | 6.41 ± 0.57 <sup>a</sup>     | 6.05 ± 0.94 <sup>a</sup>   | 3.74 ± 1.44 <sup>b</sup>     | 5.61 ± 0.85 <sup>b</sup>   | 22.29 ± 12.53 <sup>a</sup>  | 11.18 ± 2.52 <sup>b</sup>    | 16.63 ± 7.21 <sup>b</sup>    | 10.53 ± 5.38 <sup>b</sup>   | 32.36 ± 10.06 <sup>a</sup>   | 10.96 ± 4.08                | 5.55 ± 2.00                  | 23.70 ± 27.99                | 5.39 ± 0.50                  | 8.32 ± 1.73                  |
| Glu | 1.44 ± 0.36                  | 1.37 ± 0.32                  | 1.02 ± 0.22                | 1.02 ± 0.25                  | 1.13 ± 0.19                | 60.70 ± 5.08 <sup>a</sup>   | 38.50 ± 7.71 <sup>b</sup>    | 56.11 ± 10.58 <sup>a</sup>   | 47.84 ± 6.75 <sup>ab</sup>  | 52.23 ± 11.73 <sup>ab</sup>  | 7.43 ± 2.92 <sup>ab</sup>   | 5.24 ± 1.18 <sup>ab</sup>    | 10.77 ± 7.05 <sup>a</sup>    | 3.77 ± 0.99 <sup>b</sup>     | 4.33 ± 0.81 <sup>b</sup>     |
| Asp | 0.00 ± 0.00                  | 0.03 ± 0.06                  | 0.00 ± 0.00                | 0.00 ± 0.00                  | 0.00 ± 0.00                | 61.85 ± 8.72 <sup>ab</sup>  | 51.78 ± 20.04 <sup>a</sup>   | 68.96 ± 4.36 <sup>ab</sup>   | 72.95 ± 7.13 <sup>a</sup>   | 72.58 ± 5.59 <sup>a</sup>    | 1.60 ± 0.56 <sup>ab</sup>   | 1.53 ± 0.06 <sup>ab</sup>    | 4.73 ± 4.71 <sup>a</sup>     | 0.21 ± 0.08 <sup>b</sup>     | 1.41 ± 1.59 <sup>ab</sup>    |
| Asn | 0.00 ± 0.00                  | 0.00 ± 0.00                  | 0.00 ± 0.00                | 0.00 ± 0.00                  | 0.00 ± 0.00                | 0.00 ± 0.00                 | 0.00 ± 0.00                  | 0.00 ± 0.00                  | 0.00 ± 0.00                 | 0.00 ± 0.00                  | 0.00 ± 0.00                 | 0.00 ± 0.01                  | 0.00 ± 0.00                  | 0.00 ± 0.00                  | 0.00 ± 0.00                  |
| Arg | 2.67 ± 0.57 <sup>a</sup>     | 1.24 ± 1.11 <sup>b</sup>     | 2.25 ± 0.31 <sup>ab</sup>  | 1.48 ± 0.71 <sup>ab</sup>    | 2.32 ± 0.35 <sup>ab</sup>  | 0.25 ± 0.17                 | 0.39 ± 0.04                  | 0.27 ± 0.25                  | 0.19 ± 0.04                 | 0.17 ± 0.05                  | 2.00 ± 0.44                 | 1.97 ± 0.61                  | 5.14 ± 5.81                  | 1.22 ± 0.11                  | 1.28 ± 0.62                  |
| Cys | 0.00 ± 0.00                  | 0.00 ± 0.00                  | 0.00 ± 0.00                | 0.00 ± 0.00                  | 0.00 ± 0.00                | 0.00 ± 0.00                 | 0.00 ± 0.00                  | 0.00 ± 0.00                  | 0.00 ± 0.00                 | 0.00 ± 0.00                  | 0.00 ± 0.00                 | 0.00 ± 0.00                  | 0.00 ± 0.00                  | 0.00 ± 0.00                  | 0.00 ± 0.00                  |
| His | 0.00 ± 0.00                  | 0.00 ± 0.00                  | 0.00 ± 0.00                | 0.00 ± 0.00                  | 0.00 ± 0.00                | 28.00 ± 9.00                | 28.81 ± 2.83                 | 36.26 ± 0.76                 | 27.96 ± 17.23               | 29.57 ± 21.59                | 7.36 ± 5.05                 | 5.67 ± 4.12                  | 8.35 ± 1.27                  | 7.83 ± 0.86                  | 9.64 ± 1.20                  |
| Ala | 0.00 ± 0.00                  | 0.00 ± 0.00                  | 0.00 ± 0.00                | 0.00 ± 0.00                  | 0.00 ± 0.00                | 3.66 ± 0.28                 | 4.75 ± 2.69                  | 3.79 ± 0.16                  | 4.39 ± 1.17                 | 4.51 ± 1.24                  | 1.52 ± 0.16                 | 1.87 ± 1.07                  | 1.31 ± 0.28                  | 1.21 ± 0.18                  | 2.60 ± 2.04                  |
| Met | 14.34 ± 12.12                | 9.95 ± 7.20                  | 7.52 ± 4.11                | 7.86 ± 0.74                  | 13.98 ± 2.74               | 200.79 ± 87.97              | 82.78 ± 38.89                | 181.73 ± 50.97               | 148.29 ± 32.43              | 183.06 ± 101.58              | 27.58 ± 0.57                | 29.72 ± 1.72                 | 28.85 ± 22.65                | 24.16 ± 3.17                 | 23.43 ± 5.09                 |
| Try | 20.93 ± 4.17                 | 17.62 ± 5.27                 | 15.22 ± 1.69               | 17.87 ± 3.86                 | 17.82 ± 0.04               | 20.47 ± 1.13 <sup>a</sup>   | 12.24 ± 1.20 <sup>c</sup>    | 17.33 ± 1.57 <sup>ab</sup>   | 16.36 ± 1.06 <sup>b</sup>   | 19.35 ± 3.09 <sup>ab</sup>   | 10.50 ± 0.42 <sup>ab</sup>  | 13.82 ± 7.18 <sup>ab</sup>   | 8.20 ± 4.66 <sup>b</sup>     | 9.34 ± 0.13 <sup>ab</sup>    | 19.12 ± 10.09 <sup>a</sup>   |

<sup>1</sup>Values are expressed as the mean ± standard deviation. Means with different superscript letters in the same row significantly differ (*p*<0.05).  
<sup>2</sup>The CC group was fed the control diet for 8 weeks; the GG group was fed a glutamine-containing diet for 8 weeks; the CE group was fed the control diet the first 2 weeks and an ethanol-containing diet the next 6 weeks; the GE group was fed a glutamine-containing diet the first 2 weeks and then an ethanol-containing diet the next 6 weeks; the GEG group was fed a glutamine-containing diet the first 2 weeks, and then a glutamine-containing diet with ethanol the next 6 weeks. Val, valine; Tyr, tyrosine; Thr, threonine; S, serine; Pro, proline; Phe, phenylalanine; Lys, lysine; Leu, leucine; Ile, isoleucine; Gly, glycine; Gln, glutamine; Glu, glutamic acid; Asp, aspartic acid; Asn, asparagine; Arg, arginine; Cys, cysteine; His, histidine; Ala, alanine; Met, methionine; Try, tryptophan.
